# Supplementary material
Source: PubMed Central journal article supplement (PMC4687459)
Supplement: NIHMS742835-supplement-Supplement_Table_1.pdf [file NIHMS742835-supplement-Supplement_Table_1.pdf]

**Supplementary Table 1**

| <b>Primers</b>         | <b>Sequence</b>                                                  |
|------------------------|------------------------------------------------------------------|
| PCR Region_1 fw        | 5' GGAGATTGGGGAATATATATGAGT 3'                                   |
| PCR Region_1 rew       | Biotinylated 5' TTCTACATCCAACCCCATCTATAACA 3' (purified by HPLC) |
| Seq Primer Region_1 fw | 5' GAGGGTAGTTTTGGG 3'                                            |
| PCR Region_2 fw        | 5' TGGGGTTGGATGTAGAAGAGAATT 3'                                   |
| PCR Region_2 rew       | Biotinylated 5' TATTTCCAAAAATCCCATCTTAACAT 3' (purified by HPLC) |
| Seq Primer Region_2 fw | 5'ATTTTAGTTGGTTTTTAGGGATA 3'                                     |
