# Supplementary material
Source: PubMed Central journal article supplement (PMC4687459)

Suppl. Fig. 1

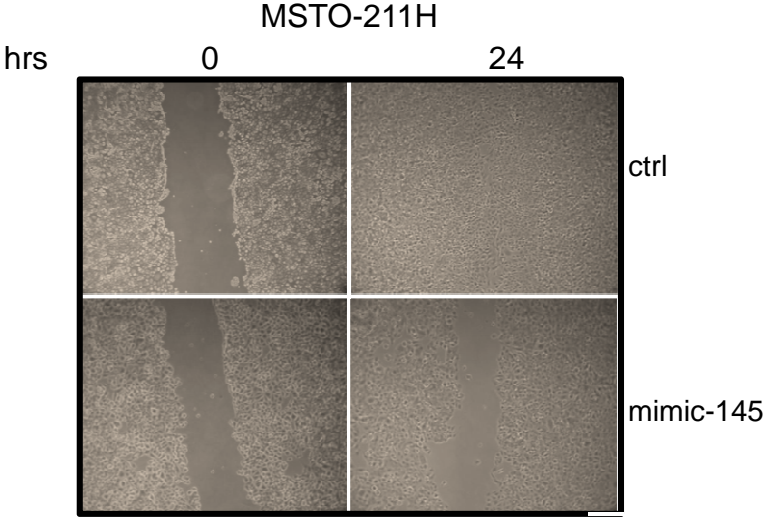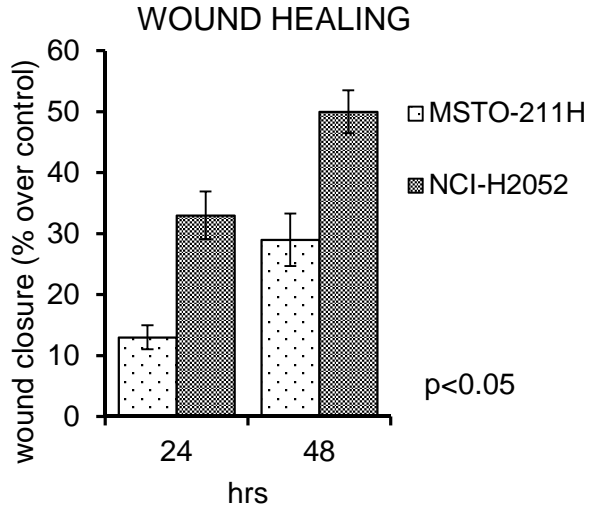

Supplement: NIHMS742835-supplement-Supplement_Figure_1.pdf [file NIHMS742835-supplement-Supplement_Figure_1.pdf]

# Suppl. Fig. 2

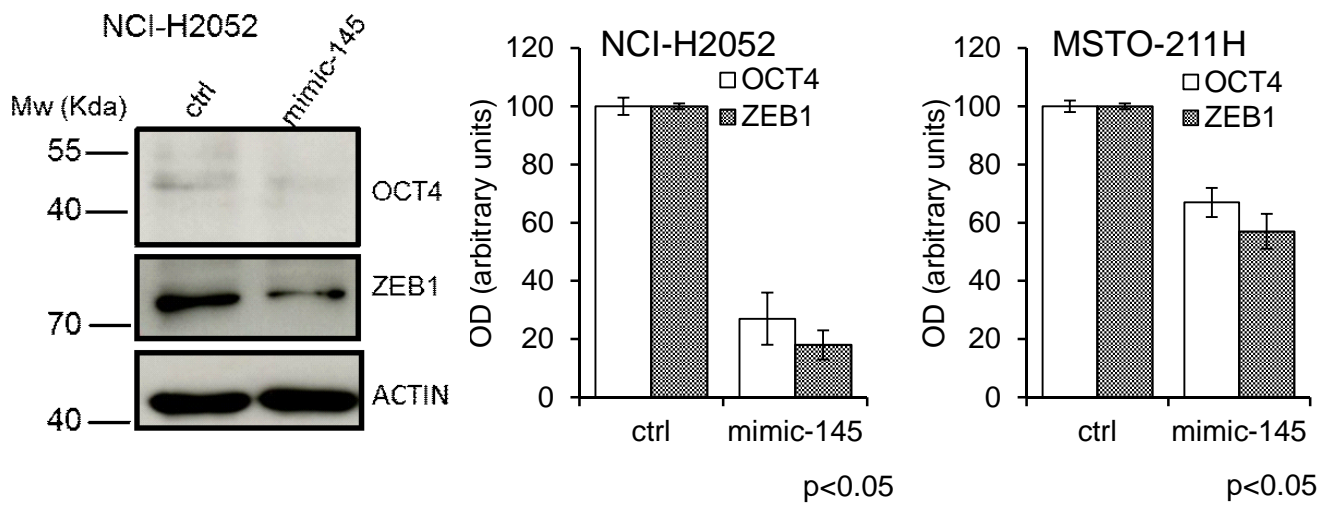

Supplement: NIHMS742835-supplement-Supplement_Figure_2.pdf [file NIHMS742835-supplement-Supplement_Figure_2.pdf]

# Suppl. Fig. 3

A

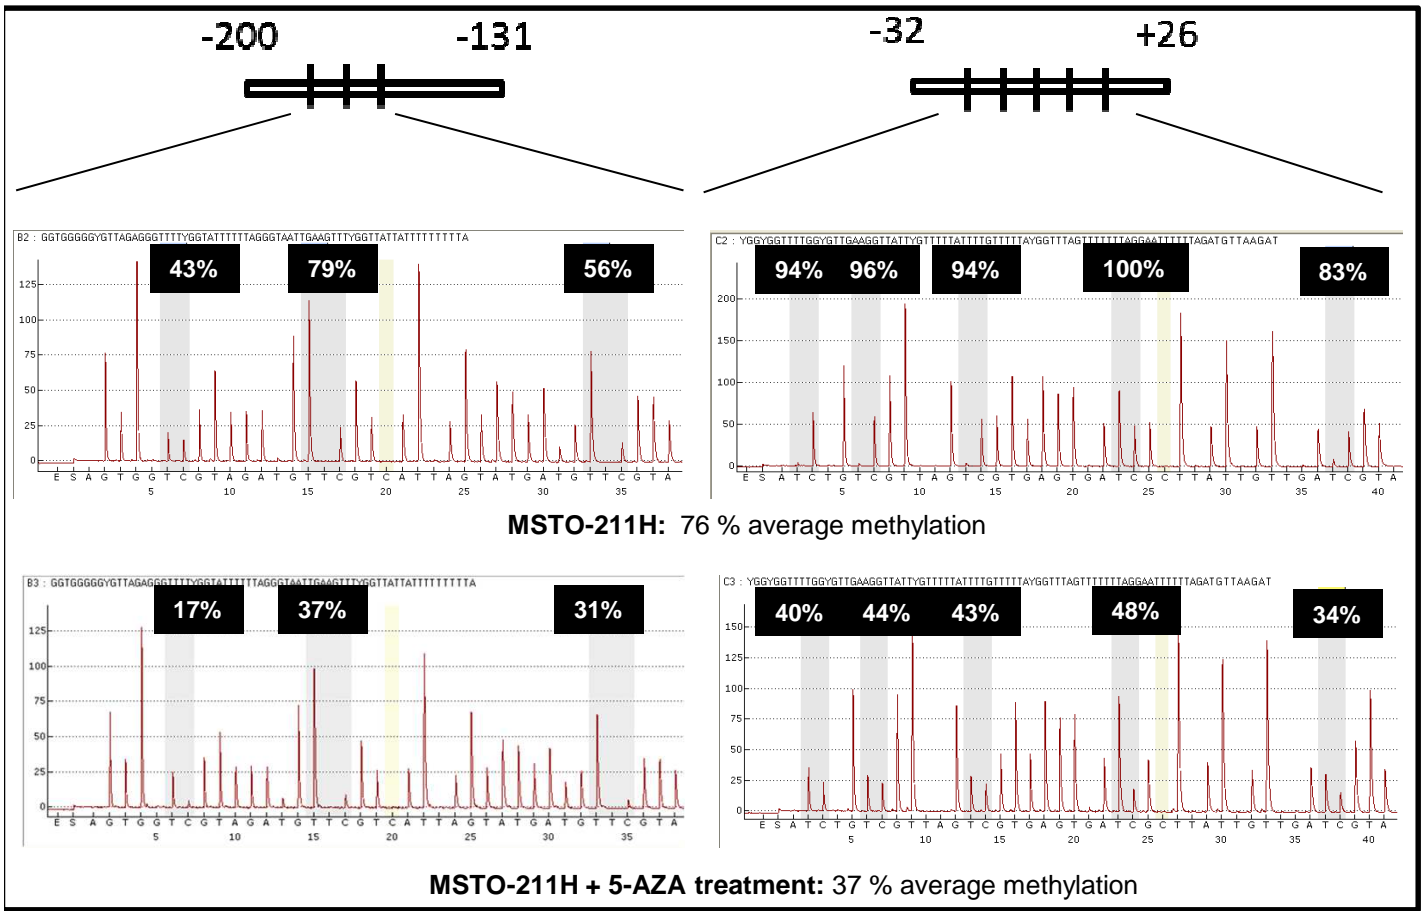

B

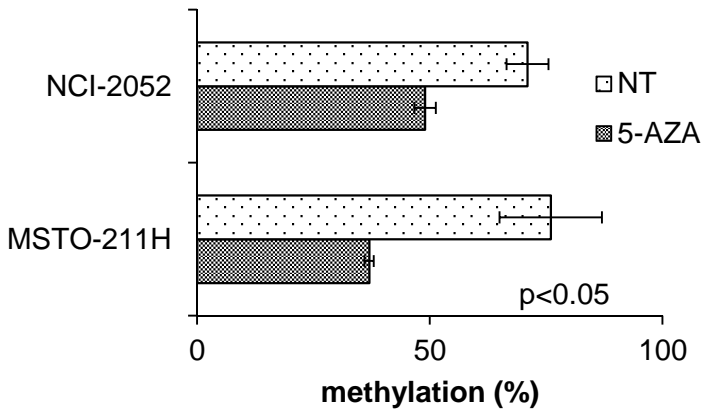

C

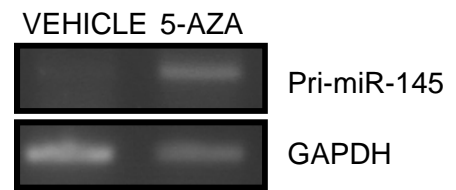

Supplement: NIHMS742835-supplement-Supplement_Figure_3.pdf [file NIHMS742835-supplement-Supplement_Figure_3.pdf]
